# Supplementary material for: Quantum chemical studies of transition metal single-atom catalysts: exploration of catalytic descriptors
Source: Royal Society of Chemistry journal article supplement (doi:10.1039/d4tc01052c), 2024-01-01
Supplement: d4tc01052c1.pdf [file d4tc01052c1.pdf]

## Supporting Information

### Quantum Chemical Studies of Transition Metal Single-Atom Catalysts: Catalytic Descriptors Exploration

Bo Li<sup>a,‡</sup>, Mingyue Zheng<sup>b,‡</sup>, Shichen Lin,<sup>c</sup> Feng Long Gu<sup>d</sup>, Jun Jiang<sup>e</sup>, and Chuanyi Jia<sup>a,\*</sup>

<sup>a</sup>Guizhou Provincial Key Laboratory of Computational Nano-Material Science, Institute of Applied Physics, Guizhou Education University, Guiyang, Guizhou 550018, China

<sup>b</sup>Department of Investigation, Shandong Police College, Jinan, Shandong 250200, China

<sup>c</sup>Interdisciplinary Graduate School of Engineering Sciences, Kyushu University, 6-1 Kasuga-Park, Fukuoka 816-8580, Japan

<sup>d</sup>MOE Key Laboratory of Environmental Theoretical Chemistry and SCNU Environmental Research Institute, Guangdong Provincial Key Laboratory of Chemical Pollution and Environmental Safety & School of Environment, South China Normal University, Guangzhou 510006, China

<sup>e</sup>Key Laboratory of Precision and Intelligent Chemistry, School of Chemistry and Materials Science, University of Science and Technology of China, Hefei, Anhui 230026, China

#### Corresponding Author

\*cyjia@gznc.edu.cn

# 1. Binding Stabilities and Optimized Electronic and Atomic Structures of NC Supported Fe, Co, and Ni Single-Atom Catalysts (SACs) with Different Spin States.

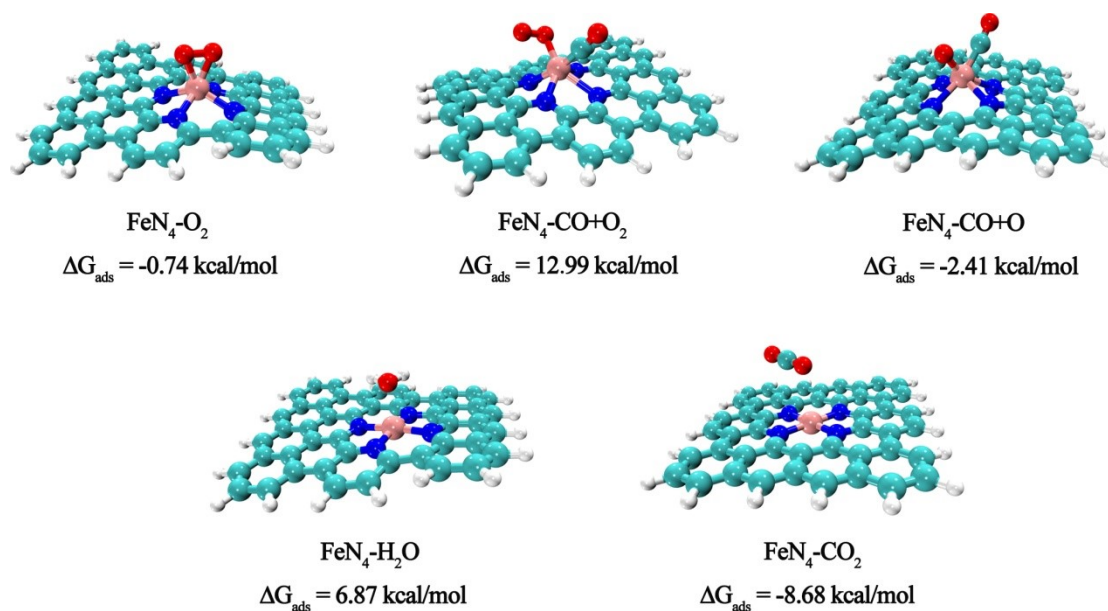

**Figure S1.** Optimized structures and adsorption Gibbs free energies ( $\Delta G_{\text{ads}}$ ) of O<sub>2</sub>, CO+O<sub>2</sub>, CO+O, H<sub>2</sub>O, and CO<sub>2</sub> on N<sub>4</sub>-coordinated Fe-SACs (S = 1). Fe atoms are in pink, C in cyan, H in white, and N in deep blue.

**Table S1.** Adsorption Gibbs free energies ( $\Delta G_{\text{TM}}$ , kcal/mol) of transition metals (TMs); electronic spin moments ( $\mu_{\text{B}}$ ) of TMs before/after O adsorption under different spin states; Mulliken charges ( $e^-$ ) of O ( $\Delta q$ , after reactants adsorption) on TMs.

|                       | $\Delta G_{\text{TM}}$ | $\mu_{\text{B}}$ | $\Delta q$ |
|-----------------------|------------------------|------------------|------------|
| <b>Fe(II)(S=0)</b>    | -151.72                | --               | -0.43      |
| <b>Fe(III)(S=1/2)</b> | -160.50                | 0.00/2.56        | -0.44      |
| <b>Fe(II)(S=1)</b>    | -116.68                | 0.09/2.63        | -0.47      |
| <b>Fe(III)(S=3/2)</b> | -108.78                | 1.95/2.75        | -0.44      |
| <b>Fe(II)(S=2)</b>    | -155.49                | 3.52/2.72        | -0.46      |
| <b>Fe(III)(S=5/2)</b> | -86.74                 | 3.51/2.64        | -0.44      |
| <b>Co(III)(S=0)</b>   | -80.22                 | --               | --         |
| <b>Co(II)(S=1/2)</b>  | -190.89                | 2.00/1.55        | -0.47      |
| <b>Co(III)(S=1)</b>   | -88.07                 | 2.59/1.62        | -0.44      |
| <b>Co(II)(S=3/2)</b>  | -126.79                | 2.27/1.61        | -0.47      |
| <b>Co(III)(S=2)</b>   | -186.30                | 2.57/1.63        | -0.44      |
| <b>Co(II)(S=5/2)</b>  | -143.51                | 2.66/2.82        | -0.47      |
| <b>Ni(II)(S=0)</b>    | --                     | --               | --         |
| <b>Ni(III)(S=1/2)</b> | -131.59                | 1.64/1.34        | -0.38      |
| <b>Ni(II)(S=1)</b>    | -166.32                | 1.62/1.70        | -0.42      |
| <b>Ni(III)(S=3/2)</b> | -92.46                 | 1.64/1.69        | -0.44      |
| <b>Ni(II)(S=2)</b>    | -227.25                | 1.68/1.70        | -0.46      |
| <b>Ni(III)(S=5/2)</b> | -172.48                | 1.69/1.69        | -0.44      |

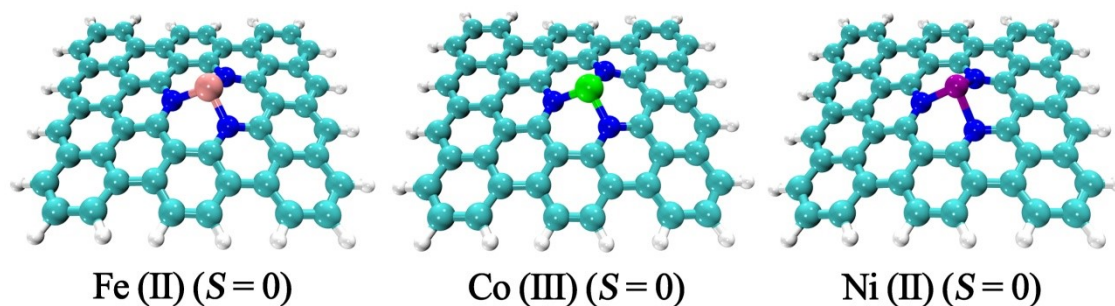

**Figure S2.** Optimized structures of NC supported Fe, Co, and Ni SACs ( $S = 0$ ). Co atoms are in green, Ni in brown, and other atoms are the same as in Figure S1.

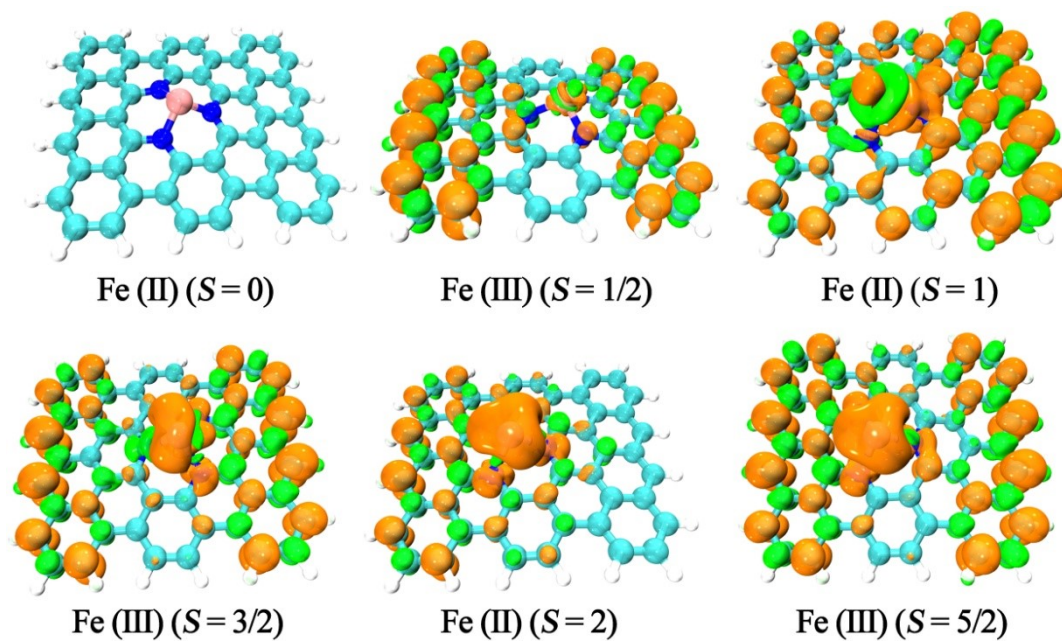

**Figure S3.** Structures and spin densities (isovalue is 0.001) of NC supported Fe(II) and Fe(III) SACs with different spin states. See Figure S1 for color coding.

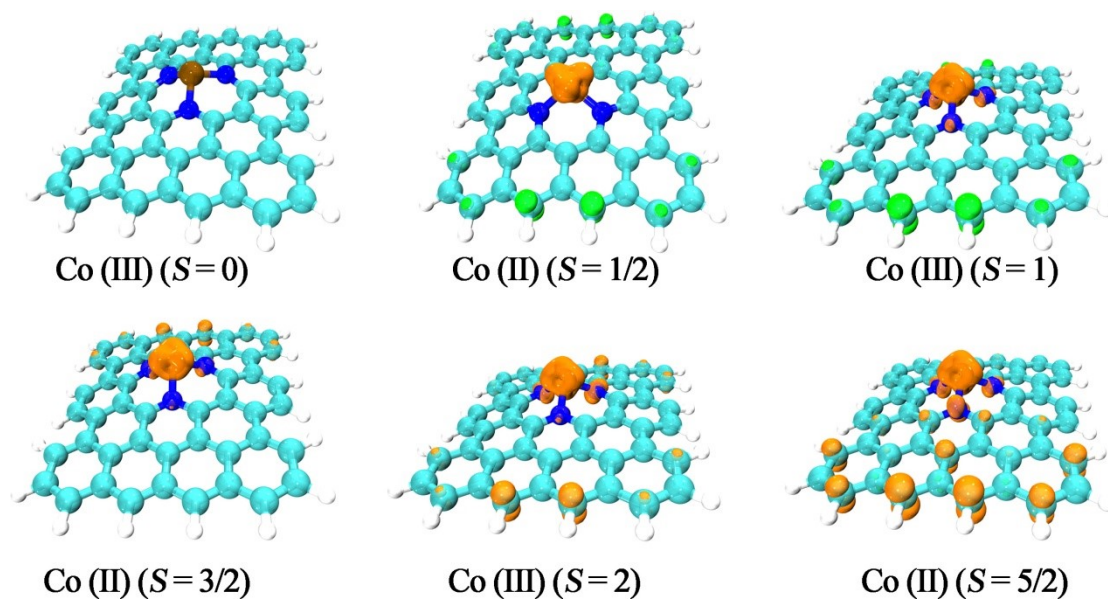

**Figure S4.** Structures and spin densities (isovalue is 0.009) of NC supported Co(II) and Co(III) SACs with different spin states. See Figure S2 for color coding.

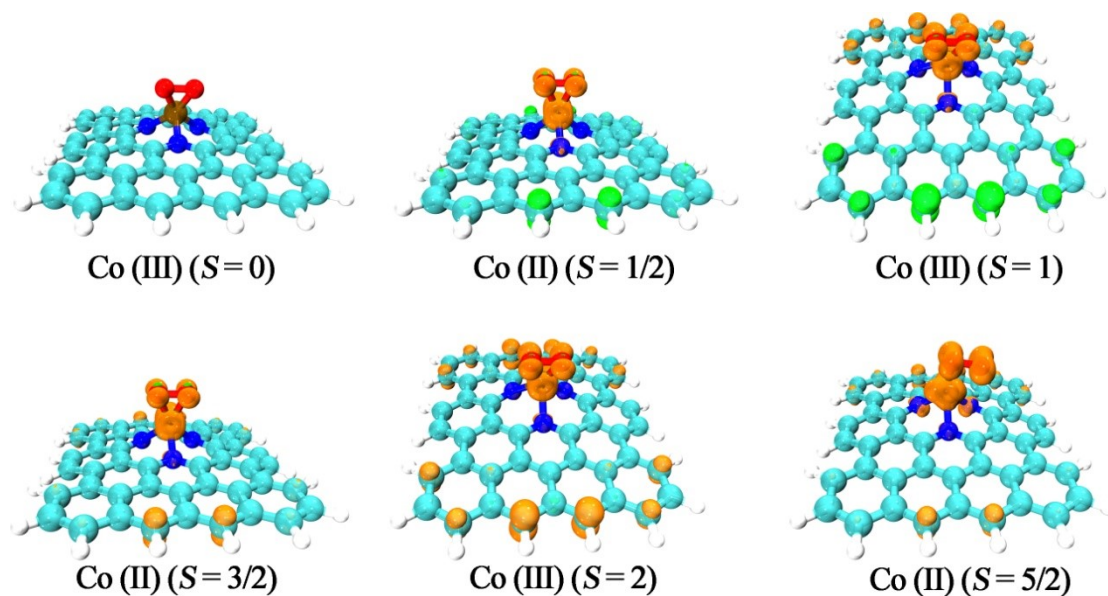

**Figure S5.** Structures and spin densities (isovalue is 0.009) of  $O_2$  adsorption on NC supported Co(II) and Co(III) SACs with different spin states. See Figure S2 for color coding.

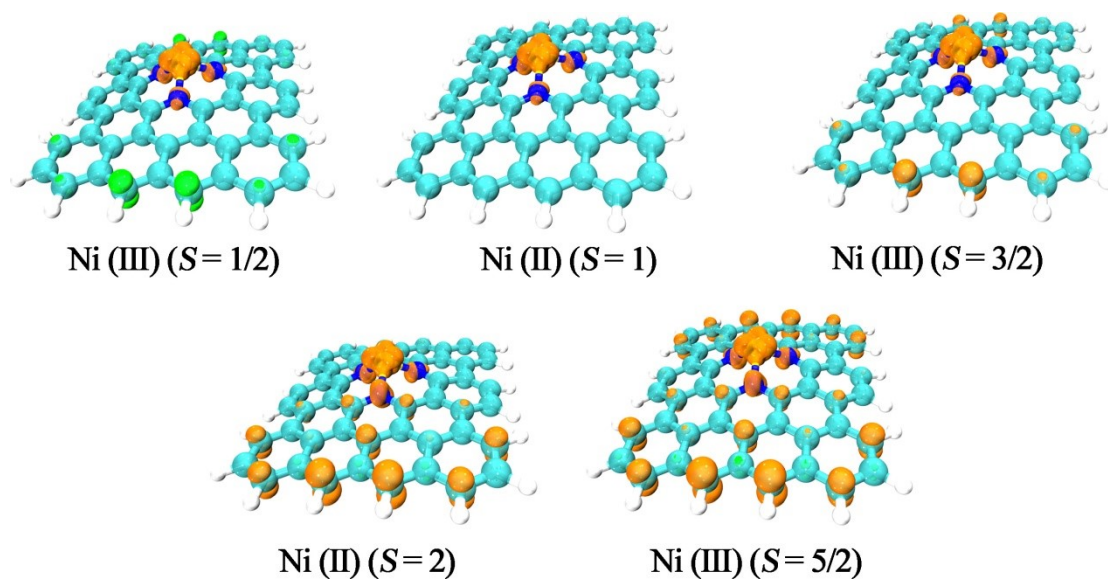

**Figure S6.** Structures and spin densities (isovalue is 0.009) of NC supported Ni(II) and Ni(III) SACs with different spin states. See Figure S2 for color coding.

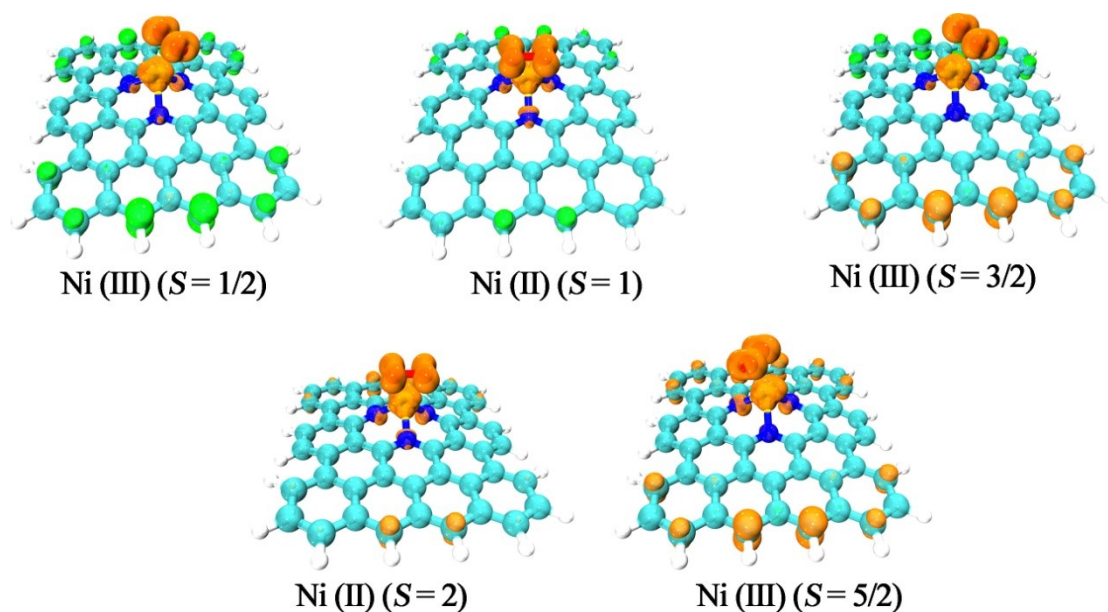

**Figure S7.** Structures and spin densities (isovalue is 0.009) of  $\text{O}_2$  adsorption on NC supported Ni(II) and Ni(III) SACs with different spin states. See Figure S2 for color coding.

## 2. Detailed Data and Corresponding Correlations for the Catalytic Properties of NC Supported Fe, Co, and Ni SACs with Different Spin States.

**Table S2.** Electronic spin moments ( $\mu_B$ ) of transition metals (TMs) before/after O<sub>2</sub>, CO+O<sub>2</sub>, CO+O, H<sub>2</sub>O, and CO<sub>2</sub> adsorption under different spin states.

|                       | O <sub>2</sub> | CO+O <sub>2</sub> | CO+O      | H <sub>2</sub> O | CO <sub>2</sub> |
|-----------------------|----------------|-------------------|-----------|------------------|-----------------|
| <b>Fe(III)(S=1/2)</b> | 0.00/0.50      | 0.00/0.02         | 0.00/0.70 | 0.00/0.00        | 0.00/3.07       |
| <b>Fe(II)(S=1)</b>    | 0.09/2.75      | 0.09/0.08         | 0.09/2.39 | 0.09/1.96        | 0.09/3.04       |
| <b>Fe(III)(S=3/2)</b> | 1.95/2.83      | 1.95/0.09         | 1.95/2.38 | 1.95/3.57        | 1.95/3.07       |
| <b>Fe(II)(S=2)</b>    | 3.52/2.82      | 3.52/2.00         | 3.52/2.40 | 3.52/3.54        | 3.52/3.11       |
| <b>Fe(III)(S=5/2)</b> | 3.51/2.85      | 3.51/1.99         | 3.51/2.39 | 3.51/3.56        | 3.51/3.26       |
| <b>Co(II)(S=1/2)</b>  | 2.00/1.44      | 2.00/-0.02        | 2.00/1.28 | 2.00/2.22        | 2.00/2.00       |
| <b>Co(III)(S=1)</b>   | 2.59/1.37      | 2.59/-0.03        | 2.59/1.26 | 2.59/2.60        | 2.59/1.95       |
| <b>Co(II)(S=3/2)</b>  | 2.27/1.44      | 2.27/1.01         | 2.27/1.28 | 2.27/2.58        | 2.27/2.00       |
| <b>Co(III)(S=2)</b>   | 2.57/1.36      | 2.57/1.00         | 2.57/1.24 | 2.57/2.59        | 2.57/1.94       |
| <b>Co(II)(S=5/2)</b>  | 2.66/2.55      | 2.66/2.40         | 2.66/2.72 | 2.66/2.61        | 2.66/2.06       |
| <b>Ni(III)(S=1/2)</b> | 1.64/1.53      | 1.64/1.41         | 1.64/--   | 1.64/1.63        | 1.64/1.03       |
| <b>Ni(II)(S=1)</b>    | 1.62/1.54      | 1.62/1.43         | 1.62/--   | 1.62/1.62        | 1.62/1.03       |
| <b>Ni(III)(S=3/2)</b> | 1.64/1.53      | 1.64/1.41         | 1.64/1.55 | 1.64/1.62        | 1.64/1.03       |
| <b>Ni(II)(S=2)</b>    | 1.68/1.55      | 1.68/1.43         | 1.68/0.90 | 1.68/1.64        | 1.68/1.06       |
| <b>Ni(III)(S=5/2)</b> | 1.69/1.54      | 1.69/1.42         | 1.69/1.57 | 1.69/1.65        | 1.69/1.89       |

**Table S3.** Adsorption Gibbs free energies ( $\Delta G_{\text{ads}}$ , kcal/mol) of the molecular products ( $\text{CO}_2/\text{CO}$  in corresponding steps; the rate determining step (RDS) of  $\text{CO}_2$  dissociation.

|                       | $\text{CO}_2$<br>( $\text{CO}+\text{O}_2\rightarrow\text{CO}_2+\text{O}$ ) | $\text{CO}_2$<br>( $\text{CO}+\text{O}\rightarrow\text{CO}_2$ ) | $\text{CO}$<br>( $\text{CO}_2\rightarrow\text{CO}+\text{O}$ ) | <b>RDS</b><br>( $\text{CO}_2\rightarrow\text{CO}+\text{O}$ ) |
|-----------------------|----------------------------------------------------------------------------|-----------------------------------------------------------------|---------------------------------------------------------------|--------------------------------------------------------------|
| <b>Fe(II)(S=0)</b>    | 1.59                                                                       | -2.37                                                           | -16.50                                                        | 30.60                                                        |
| <b>Fe(III)(S=1/2)</b> | 1.93                                                                       | -18.85                                                          | -35.76                                                        | 38.12                                                        |
| <b>Fe(II)(S=1)</b>    | 1.47                                                                       | -35.06                                                          | -36.35                                                        | 36.35                                                        |
| <b>Fe(III)(S=3/2)</b> | 3.69                                                                       | -21.02                                                          | -34.32                                                        | 34.32                                                        |
| <b>Fe(II)(S=2)</b>    | -1.99                                                                      | -9.58                                                           | -36.81                                                        | 36.81                                                        |
| <b>Fe(III)(S=5/2)</b> | -1.90                                                                      | -6.63                                                           | -39.24                                                        | 39.24                                                        |
| <b>Co(III)(S=0)</b>   | --                                                                         | --                                                              | --                                                            | --                                                           |
| <b>Co(II)(S=1/2)</b>  | 0.11                                                                       | -7.37                                                           | -47.65                                                        | 47.65                                                        |
| <b>Co(III)(S=1)</b>   | 2.59                                                                       | -1.36                                                           | -48.91                                                        | 48.91                                                        |
| <b>Co(II)(S=3/2)</b>  | -10.19                                                                     | -5.36                                                           | -47.65                                                        | 47.65                                                        |
| <b>Co(III)(S=2)</b>   | -9.89                                                                      | -1.11                                                           | -48.74                                                        | 48.74                                                        |
| <b>Co(II)(S=5/2)</b>  | -0.01                                                                      | -0.58                                                           | -19.95                                                        | 27.70                                                        |
| <b>Ni(II)(S=0)</b>    | --                                                                         | --                                                              | --                                                            | --                                                           |
| <b>Ni(III)(S=1/2)</b> | 2.79                                                                       | --                                                              | --                                                            | --                                                           |
| <b>Ni(II)(S=1)</b>    | 0.76                                                                       | --                                                              | --                                                            | --                                                           |
| <b>Ni(III)(S=3/2)</b> | 0.87                                                                       | --                                                              | --                                                            | --                                                           |
| <b>Ni(II)(S=2)</b>    | 0.59                                                                       | -0.22                                                           | -34.02                                                        | 36.93                                                        |
| <b>Ni(III)(S=5/2)</b> | --                                                                         | 6.62                                                            | -31.01                                                        | 35.56                                                        |



**Table S4.** TM-O bond lengths (L/Å) of adsorbed O<sub>2</sub>, CO+O<sub>2</sub>, CO+O, H<sub>2</sub>O, and CO<sub>2</sub> under different spin states. Specifically, for the reactant that has two TM-O bonds (O<sub>2</sub>/CO+O<sub>2</sub>), L(TM-O) is the average length of these two bonds.

|                       | O <sub>2</sub> | CO+O <sub>2</sub> | CO+O | H <sub>2</sub> O | CO <sub>2</sub> |
|-----------------------|----------------|-------------------|------|------------------|-----------------|
| <b>Fe(II)(S=0)</b>    | 1.84           | 1.92              | 1.65 | 2.12             | 2.17            |
| <b>Fe(III)(S=1/2)</b> | 1.83           | 1.96              | 1.65 | 2.09             | 1.95            |
| <b>Fe(II)(S=1)</b>    | 1.82           | 1.96              | 1.66 | 2.08             | 1.95            |
| <b>Fe(III)(S=3/2)</b> | 1.82           | 1.96              | 1.66 | 2.13             | 1.94            |
| <b>Fe(II)(S=2)</b>    | 1.82           | 2.17              | 1.67 | 2.16             | 1.97            |
| <b>Fe(III)(S=5/2)</b> | 1.82           | 2.15              | 1.66 | 2.12             | 2.01            |
| <b>Co(III)(S=0)</b>   | 1.84           | 1.90              | --   | 2.04             | 1.92            |
| <b>Co(II)(S=1/2)</b>  | 1.84           | 1.90              | 1.68 | 2.15             | 1.96            |
| <b>Co(III)(S=1)</b>   | 1.85           | 1.89              | 1.68 | 2.09             | 2.06            |
| <b>Co(II)(S=3/2)</b>  | 1.84           | 2.21              | 1.68 | 2.14             | 1.96            |
| <b>Co(III)(S=2)</b>   | 1.85           | 2.18              | 1.68 | 2.08             | 2.06            |
| <b>Co(II)(S=5/2)</b>  | 1.57           | 2.17              | 1.69 | 2.15             | 1.97            |
| <b>Ni(II)(S=0)</b>    | --             | --                | --   | --               | --              |
| <b>Ni(III)(S=1/2)</b> | 2.01           | 2.11              | --   | 2.10             | 1.98            |
| <b>Ni(II)(S=1)</b>    | 2.02           | 2.12              | --   | 2.12             | 1.98            |
| <b>Ni(III)(S=3/2)</b> | 2.00           | 2.11              | 1.75 | 2.09             | 1.98            |
| <b>Ni(II)(S=2)</b>    | 2.02           | 2.12              | 1.75 | 2.13             | 1.98            |
| <b>Ni(III)(S=5/2)</b> | 2.01           | 2.11              | 1.75 | 2.10             | 2.29            |

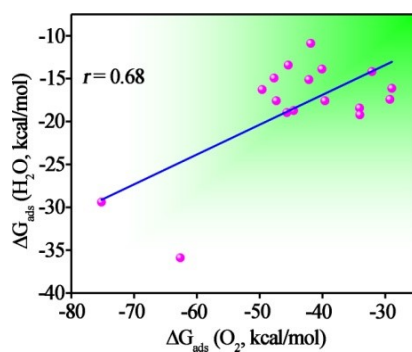

**Figure S8.** Correlation between the binding stability ( $\Delta G_{\text{ads}}$ ) of  $\text{O}_2$  and  $\text{H}_2\text{O}$ . Colored background indicates the change trend of the linear relationship.

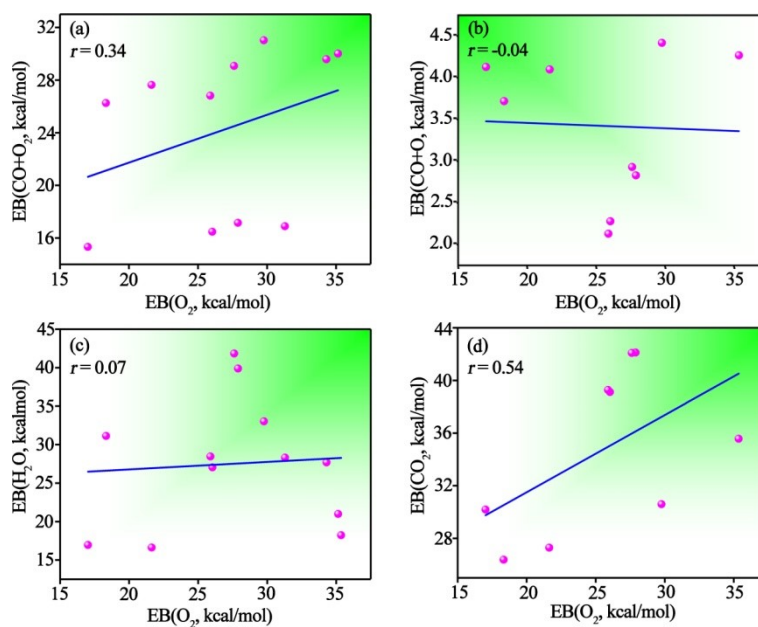

**Figure S9.** Correlations between the energy barrier (EB) of  $\text{O}_2$  and EB of  $\text{CO}+\text{O}_2$  (a),  $\text{CO}+\text{O}$  (b),  $\text{H}_2\text{O}$  (c), and  $\text{CO}_2$  (d). Colored backgrounds indicate the change trends of the linear relationships.

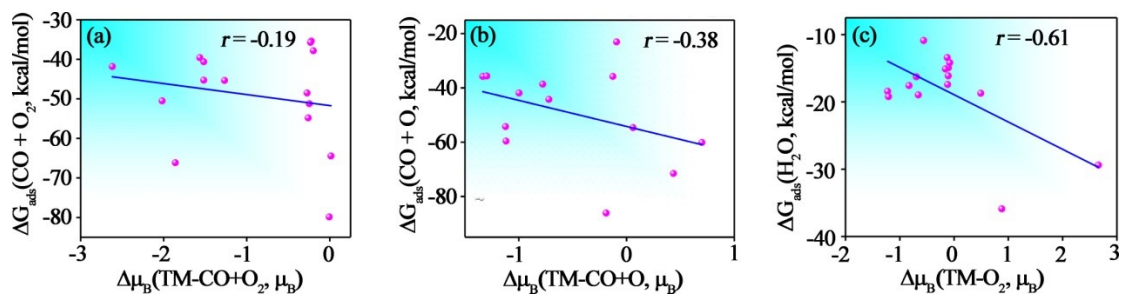

**Figure S10.** Correlations between the variation of electronic spin moment ( $\Delta\mu_B$ ) of TM (before and after reactants adsorption) and  $\Delta G_{\text{ads}}$  of CO+O<sub>2</sub> (a) and CO+O (b); Correlation between the  $\Delta\mu_B$  of TM (before and after O<sub>2</sub> adsorption) and  $\Delta G_{\text{ads}}$  of H<sub>2</sub>O (c). Detailed data is shown in Table S2. Colored backgrounds indicate the change trends of the linear relationships.

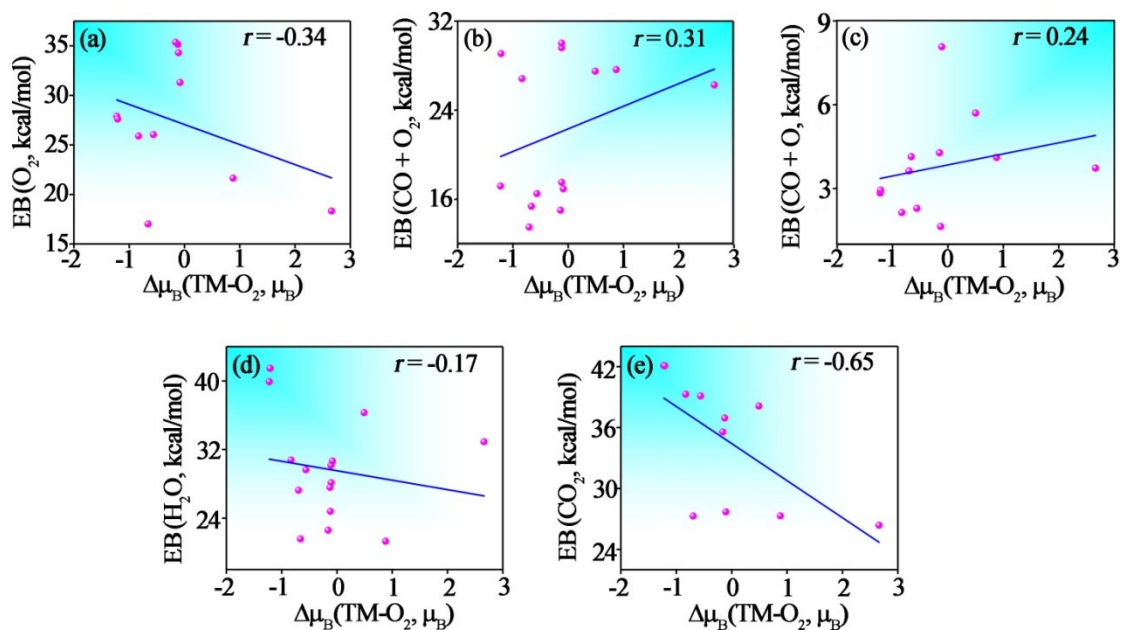

**Figure S11.** Correlations between the variation of electronic spin moment ( $\Delta\mu_B$ ) of TM (before and after O<sub>2</sub> adsorption) and EB of O<sub>2</sub> (a), CO+O<sub>2</sub> (b), CO+O (c), H<sub>2</sub>O (d), and CO<sub>2</sub> (e). Detailed data is shown in Table S2. Colored backgrounds indicate the change trends of the linear relationships.

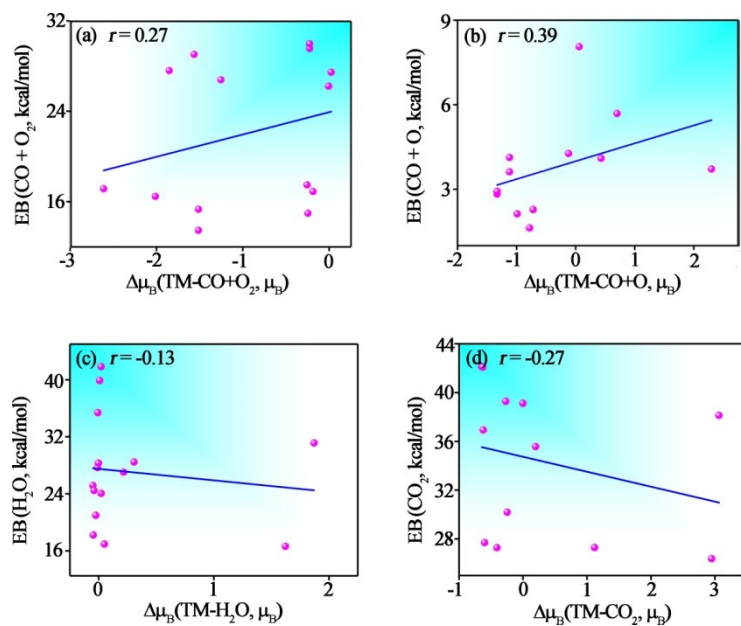

**Figure S12.** Correlations between the variation of electronic spin moment ( $\Delta\mu_B$ ) of TM (before and after reactants adsorption) and EB of CO+O<sub>2</sub> (a), CO+O (b), H<sub>2</sub>O (c), and CO<sub>2</sub> (d). Detailed data is shown in Table S2. Colored backgrounds indicate the change trends of the linear relationships.

**Table S5.** The Mulliken charges ( $e^-$ ) of O<sub>2</sub>, CO+O<sub>2</sub>, CO+O, H<sub>2</sub>O and CO<sub>2</sub> ( $\Delta q$ , after reactants adsorption) on Fe, Co, and Ni SACs with different spin states.

|                       | O <sub>2</sub> | CO+O <sub>2</sub> | CO+O  | H <sub>2</sub> O | CO <sub>2</sub> |
|-----------------------|----------------|-------------------|-------|------------------|-----------------|
| <b>Fe(II)(S=0)</b>    | -0.57          | -0.30             | -0.21 | 0.25             | -0.11           |
| <b>Fe(III)(S=1/2)</b> | -0.52          | -0.16             | -0.18 | 0.26             | -0.25           |
| <b>Fe(II)(S=1)</b>    | -0.62          | -0.22             | -0.22 | 0.26             | -0.30           |
| <b>Fe(III)(S=3/2)</b> | -0.56          | -0.15             | -0.19 | 0.23             | -0.26           |
| <b>Fe(II)(S=2)</b>    | -0.59          | -0.25             | -0.22 | 0.24             | -0.22           |
| <b>Fe(III)(S=5/2)</b> | -0.55          | -0.20             | -0.19 | 0.24             | -0.14           |
| <b>Co(III)(S=0)</b>   | -0.51          | 0.01              | --    | 0.28             | -0.14           |
| <b>Co(II)(S=1/2)</b>  | -0.50          | 0.03              | -0.03 | 0.23             | -0.13           |
| <b>Co(III)(S=1)</b>   | -0.44          | -0.01             | 0.01  | 0.23             | 0.37            |
| <b>Co(II)(S=3/2)</b>  | -0.50          | -0.06             | -0.03 | 0.24             | -0.13           |
| <b>Co(III)(S=2)</b>   | -0.44          | -0.01             | 0.02  | 0.23             | 0.38            |
| <b>Co(II)(S=5/2)</b>  | -0.44          | -0.09             | -0.26 | 0.24             | -0.13           |
| <b>Ni(II)(S=0)</b>    | --             | --                | --    | --               | --              |
| <b>Ni(III)(S=1/2)</b> | -0.38          | -0.02             | --    | 0.25             | -0.07           |
| <b>Ni(II)(S=1)</b>    | -0.40          | -0.07             | --    | 0.25             | -0.12           |
| <b>Ni(III)(S=3/2)</b> | -0.38          | -0.02             | -0.06 | 0.26             | -0.07           |
| <b>Ni(II)(S=2)</b>    | -0.41          | -0.07             | -0.12 | 0.25             | -0.14           |
| <b>Ni(III)(S=5/2)</b> | -0.38          | -0.02             | -0.08 | 0.25             | -0.19           |

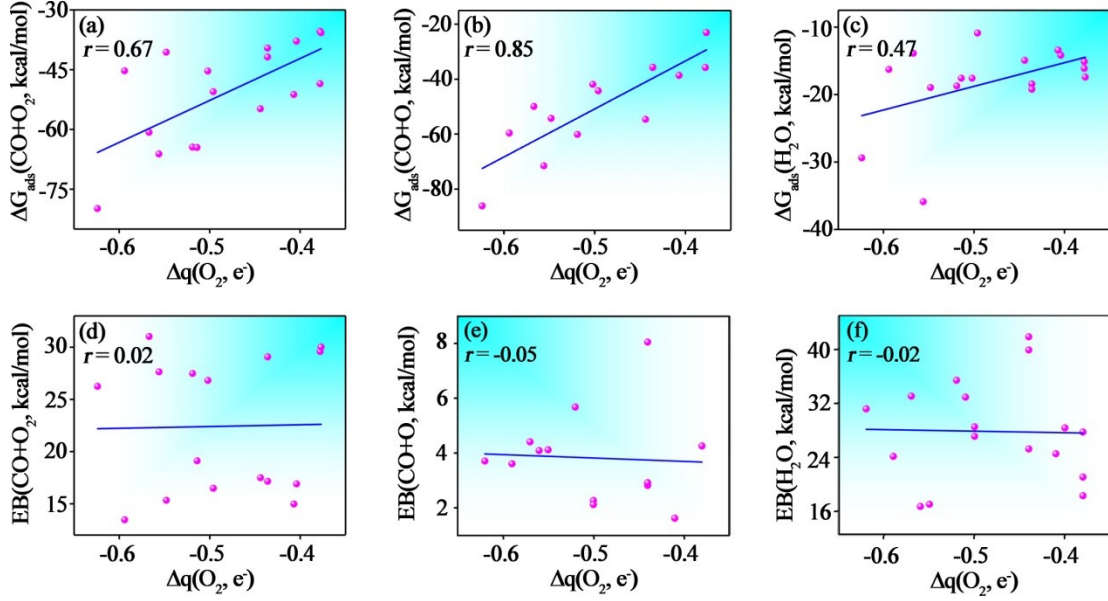

**Figure S13.** Correlations between the charge on  $O_2$  ( $\Delta q(O_2)$ , after adsorption) and  $\Delta G_{\text{ads}}$ /EB of  $CO+O_2$  (a, d),  $CO+O$  (b, e), and  $H_2O$  (c, f). Detailed data is shown in Table S5. Colored backgrounds indicate the change trends of the linear relationships.

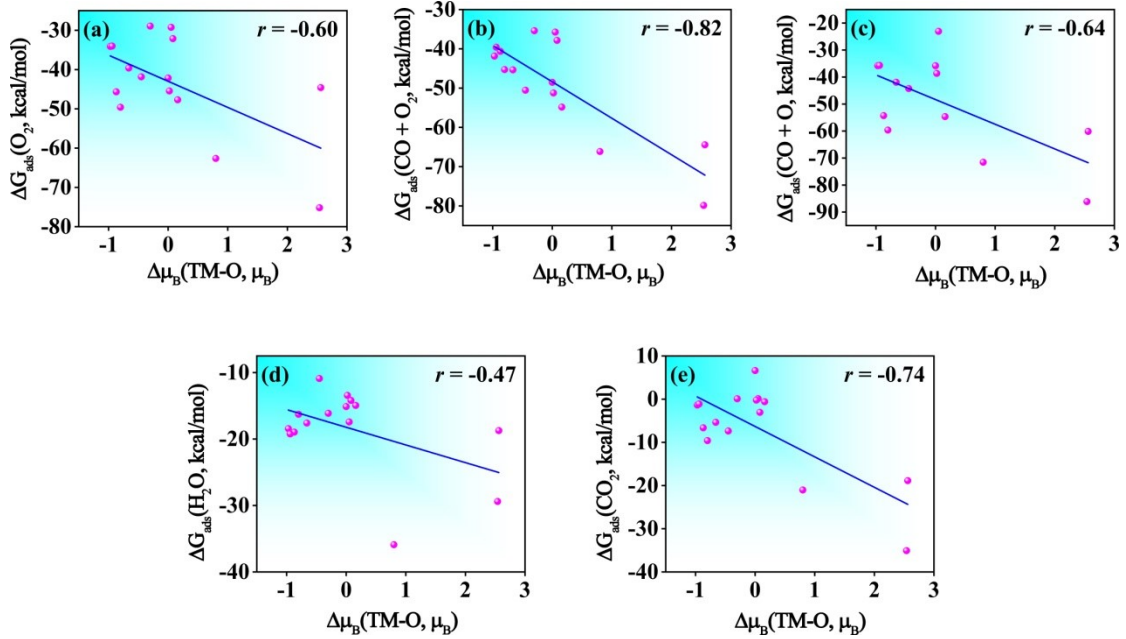

**Figure S14.** Correlations between the variation of electronic spin moment ( $\Delta\mu_B$ ) of TM (before and after O adsorption) and  $\Delta G_{\text{ads}}$  of  $O_2$  (a),  $CO+O_2$  (b),  $CO+O$  (c),  $H_2O$  (d), and  $CO_2$  (e). Detailed data is shown in Table S1. Colored backgrounds indicate the change trends of the linear relationships.

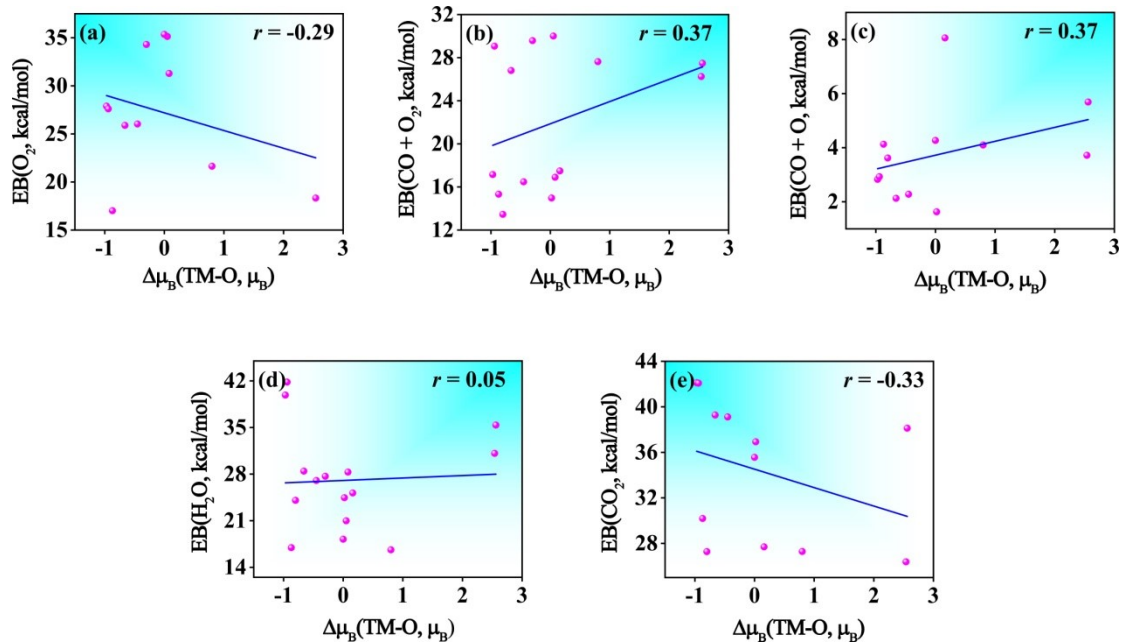

**Figure S15.** Correlations between the variation of electronic spin moment ( $\Delta\mu_B$ ) of TM (before and after O adsorption) and EB of  $O_2$  (a),  $CO+O_2$  (b),  $CO+O$  (c),  $H_2O$  (d), and  $CO_2$  (e). Detailed data is shown in Table S1. Colored backgrounds indicate the change trends of the linear relationships.

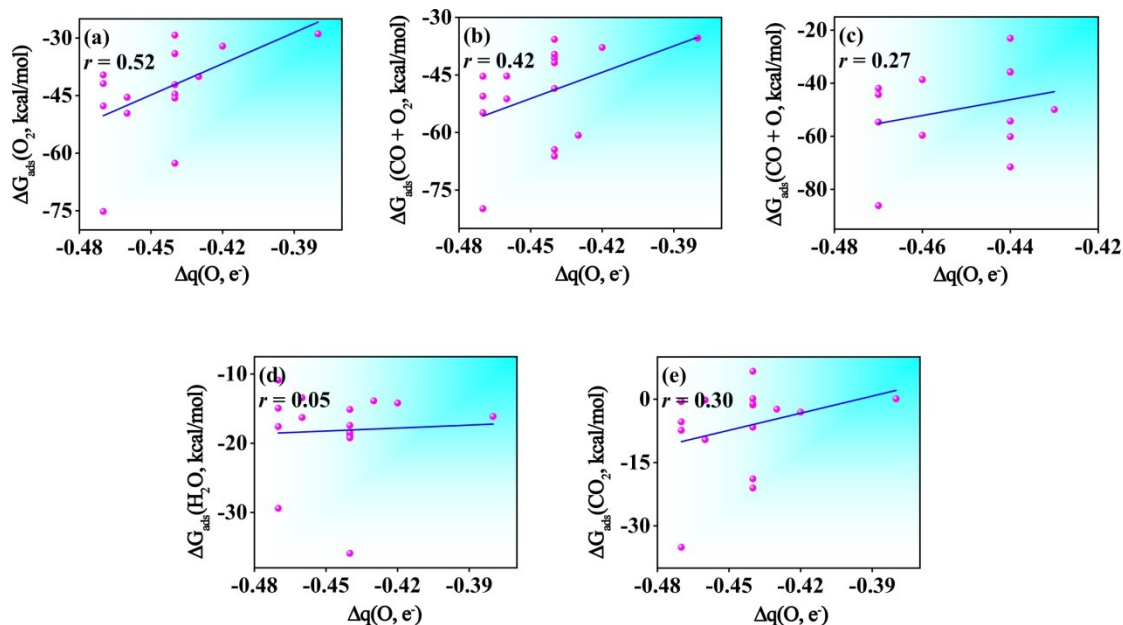

**Figure S16.** Correlations between the charge on O ( $\Delta q(O)$ , after adsorption) and  $\Delta G_{ads}$  of  $O_2$  (a),  $CO+O_2$  (b),  $CO+O$  (c),  $H_2O$  (d), and  $CO_2$  (e). Detailed data is shown in Table S1. Colored backgrounds indicate the change trends of the linear relationships.

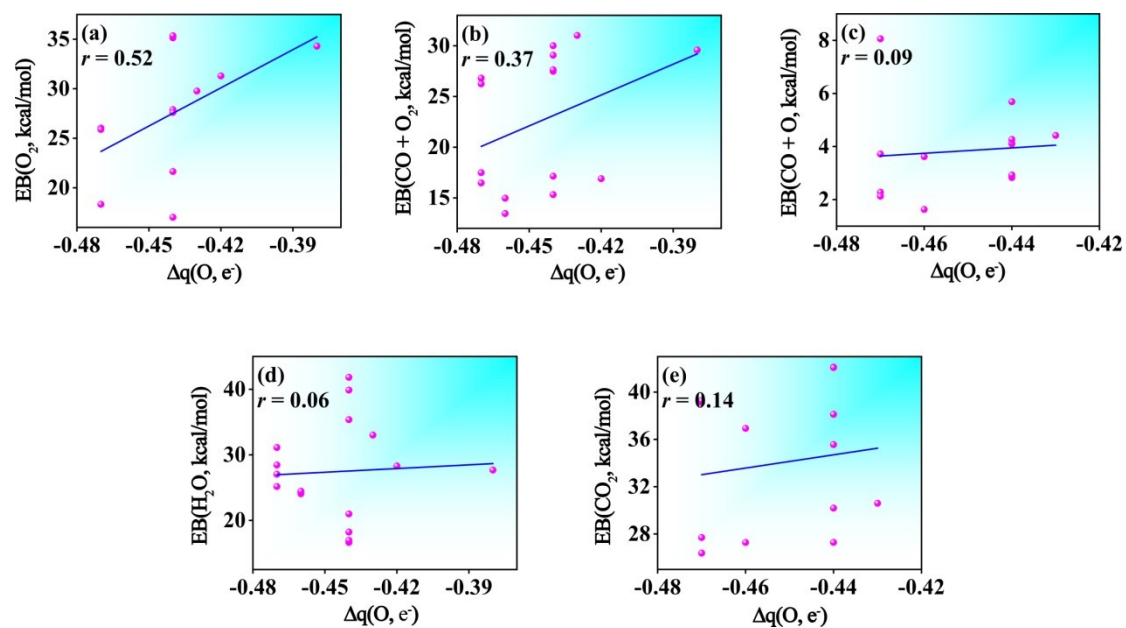

**Figure S17.** Correlations between the charge on O ( $\Delta q(\text{O})$ , after adsorption) and EB of  $\text{O}_2$  (a),  $\text{CO} + \text{O}_2$  (b),  $\text{CO} + \text{O}$  (c),  $\text{H}_2\text{O}$  (d), and  $\text{CO}_2$  (e). Detailed data is shown in Table S1. Colored backgrounds indicate the change trends of the linear relationships.



**Table S6.** Stretching vibrational frequencies ( $\nu/\text{cm}^{-1}$ ) of O-O in adsorbed  $\text{O}_2$ , O-H in adsorbed  $\text{H}_2\text{O}$ , C-O in adsorbed  $\text{CO}_2$ , and TM-O in all adsorbed reactants on Fe, Co, and Ni SACs with different spin states. Specifically, for the reactant that has two TM-O bonds ( $\text{O}_2/\text{CO}+\text{O}_2$ ),  $\nu(\text{TM-O})$  is the average frequency of these two bonds.

|                       | $\text{O}_2$ |        | $\text{CO}+\text{O}_2$ | $\text{CO}+\text{O}$ | $\text{H}_2\text{O}$ |        | $\text{CO}_2$ |        |
|-----------------------|--------------|--------|------------------------|----------------------|----------------------|--------|---------------|--------|
|                       | O-O          | TM-O   | TM-O                   | TM-O                 | O-H                  | TM-O   | C-O           | TM-O   |
| <b>Fe(II)(S=0)</b>    | 935.63       | 561.93 | 433.57                 | 790.37               | 3724.74              | 353.18 | 2064.97       | 410.21 |
| <b>Fe(III)(S=1/2)</b> | 982.95       | 465.22 | 406.11                 | 809.93               | 3744.83              | 355.48 | 1945.84       | 413.57 |
| <b>Fe(II)(S=1)</b>    | 948.98       | 503.01 | 401.48                 | 828.85               | 3735.14              | 381.37 | 1920.76       | 425.17 |
| <b>Fe(III)(S=3/2)</b> | 971.79       | 532.98 | 405.78                 | 842.55               | 3707.86              | 365.92 | 1944.73       | 421.83 |
| <b>Fe(II)(S=2)</b>    | 954.26       | 509.05 | 325.83                 | 828.31               | 3770.29              | 341.49 | 1937.12       | 378.17 |
| <b>Fe(III)(S=5/2)</b> | 974.25       | 535.62 | 331.39                 | 841.50               | 3706.53              | 366.42 | 2042.79       | 367.33 |
| <b>Co(III)(S=0)</b>   | 965.7        | 525.78 | 524.42                 | --                   | 3744.36              | 381.86 | 1932.60       | 476.32 |
| <b>Co(II)(S=1/2)</b>  | 1030.62      | 320.89 | 524.67                 | 700.43               | 3762.16              | 332.69 | 1985.93       | 443.11 |
| <b>Co(III)(S=1)</b>   | 1076.92      | 319.68 | 531.03                 | 699.96               | 3810.25              | 349.59 | 2055.67       | 378.62 |
| <b>Co(II)(S=3/2)</b>  | 1021.26      | 319.69 | 398.95                 | 700.46               | 3768.97              | 341.67 | 1984.95       | 441.93 |
| <b>Co(III)(S=2)</b>   | 1077.77      | 320.84 | 412.51                 | 701.77               | 3811.01              | 373.17 | 2055.38       | 379.51 |
| <b>Co(II)(S=5/2)</b>  | 1149.18      | 295.93 | 280.55                 | 762.71               | 3761.93              | 338.13 | 1984.48       | 436.52 |
| <b>Ni(II)(S=0)</b>    | --           | --     | --                     | --                   | --                   | --     | --            | --     |
| <b>Ni(III)(S=1/2)</b> | 1171.78      | 326.35 | 307.37                 | --                   | 3769.69              | 370.75 | 2021.55       | 421.30 |
| <b>Ni(II)(S=1)</b>    | 1164.72      | 317.66 | 304.00                 | --                   | 3752.58              | 342.52 | 1992.84       | 420.37 |
| <b>Ni(III)(S=3/2)</b> | 1171.72      | 326.65 | 307.70                 | 578.00               | 3767.85              | 348.29 | 2021.84       | 420.46 |
| <b>Ni(II)(S=2)</b>    | 1169.52      | 316.08 | 305.19                 | 583.85               | 3746.97              | 339.33 | 1983.92       | 420.35 |
| <b>Ni(III)(S=5/2)</b> | 1173.64      | 326.07 | 307.92                 | 583.81               | 3693.08              | 346.92 | 2009.28       | 318.36 |
